# Supplementary material for: Foggia Prostate Cancer Risk Calculator 2.0: A Novel Risk Calculator including MRI and Bladder Outlet Obstruction Parameters to Reduce Unnecessary Biopsies
Source: MDPI journal article supplement (doi:10.3390/ijms24032449), 2023-01-26
Supplement: s1 [file s1]

**Supplementary Figure S1.** Any GG PCa and GG $\geq$ 2 PCa detection rates according to PIRADS score.

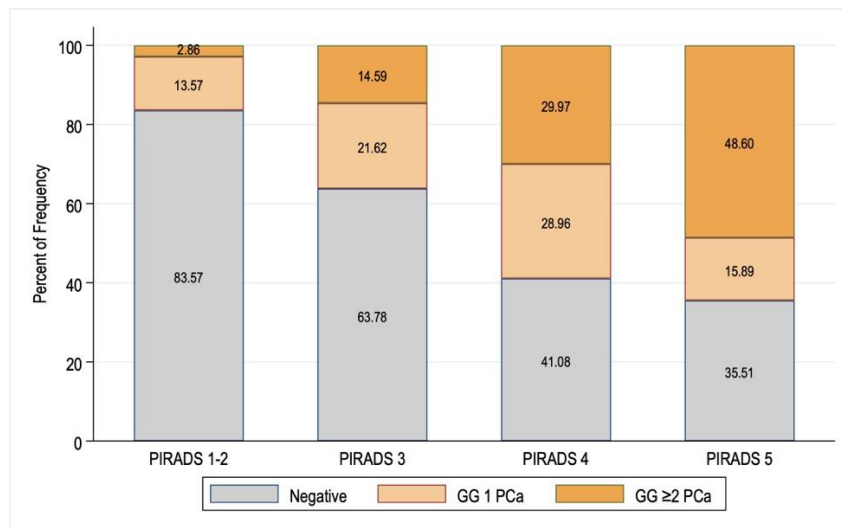

**Supplementary table S1.** Coefficients of the Logit function for the calculation of individual PCa and csPCa risk.

|                        | Multivariable model predicting Any GG PCa |        |        |                  | Multivariable model predicting GG≥2 PCa |        |        |                  |
|------------------------|-------------------------------------------|--------|--------|------------------|-----------------------------------------|--------|--------|------------------|
|                        | Coef.                                     | 95% CI |        | P> z             | Coef.                                   | 95% CI |        | P> z             |
| <b>Age</b>             | 0.054                                     | 0.029  | 0.078  | <b>&lt;0.001</b> | 0.064                                   | 0.035  | 0.093  | <b>&lt;0.001</b> |
| <b>Biopsy History</b>  |                                           |        |        |                  |                                         |        |        |                  |
| Biopsy naive           | Ref.                                      |        |        |                  | Ref.                                    |        |        |                  |
| Previous Negative      | -0.922                                    | -1.305 | -0.539 | <b>&lt;0.001</b> | -0.910                                  | -1.395 | -0.425 | <b>&lt;0.001</b> |
| <b>DRE</b>             |                                           |        |        |                  |                                         |        |        |                  |
| Negative               | Ref.                                      |        |        |                  |                                         |        |        |                  |
| Suspicious             | 0.303                                     | -0.057 | 0.662  | 0.099            | 0.704                                   | 0.290  | 1.117  | <b>0.001</b>     |
| <b>PIRADS</b>          |                                           |        |        |                  |                                         |        |        |                  |
| 1-2                    | Ref.                                      |        |        |                  |                                         |        |        |                  |
| 3                      | 1.137                                     | 0.566  | 1.709  | <b>&lt;0.001</b> | 1.692                                   | 0.576  | 2.808  | <b>0.003</b>     |
| 4                      | 1.814                                     | 1.280  | 2.347  | <b>&lt;0.001</b> | 2.334                                   | 1.275  | 3.393  | <b>&lt;0.001</b> |
| 5                      | 1.612                                     | 0.955  | 2.269  | <b>&lt;0.001</b> | 2.681                                   | 1.560  | 3.802  | <b>&lt;0.001</b> |
| <b>PSA</b>             | 0.046                                     | 0.014  | 0.079  | <b>0.005</b>     | 0.086                                   | 0.048  | 0.125  | <b>&lt;0.001</b> |
| <b>Prostate volume</b> | -0.023                                    | -0.031 | -0.016 | <b>&lt;0.001</b> | -0.024                                  | -0.034 | -0.014 | <b>&lt;0.001</b> |
| <b>PVR</b>             |                                           |        |        |                  |                                         |        |        |                  |
| 0-50                   | Ref.                                      |        |        |                  |                                         |        |        |                  |
| >50                    | -0.559                                    | -0.942 | -0.176 | <b>0.004</b>     | -1.310                                  | -1.865 | -0.756 | <b>&lt;0.001</b> |
| <b>Costant</b>         | -3.681                                    | -5.305 | -2.056 | <b>&lt;0.001</b> | -6.629                                  | -8.809 | -4.449 | <b>&lt;0.001</b> |
